# Supplementary material for: The Digital Health Paradox in Cancer Care: High Technology Access but Limited Health Literacy Among Oncology Patients
Source: Research Square preprint supplement (doi:10.21203/rs.3.rs-8534577/v1), 2026-01-16
Supplement: Supplementary file 1 [file f44efc34d1286bd28e49f76d.pdf]

# QUESTIONNAIRE ON INFORMATION AND COMMUNICATION TECHNOLOGY (ICT) USE AND HEALTH LITERACY AMONG CANCER PATIENTS

This questionnaire consists of two main parts:

Part A: Demographics and ICT Usage Patterns (Items 1-23)

Part B: Turkish Health Literacy Scale-32 (TSOY-32) - A validated instrument

## PART A: DEMOGRAPHICS AND ICT USAGE PATTERNS

### SECTION 1: DEMOGRAPHIC AND CLINICAL CHARACTERISTICS (Items 1-10)

1. Gender

- 1. Male
- 2. Female

2. Your age: \_\_\_\_\_ years

3. Marital status

- 1. Married
- 2. Single
- 3. Divorced

4. Do you live alone?

- 1. Yes
- 2. No

5. Can you benefit from home care services? (Private or government)

- 1. No
- 2. Yes

6. Education Level

- 1. Illiterate - no education
- 2. Primary School
- 3. Secondary School
- 4. High School
- 5. University

7. How do you evaluate your family's monthly income compared to your expenses?

- 1. Good
- 2. Medium
- 3. Bad

8. Describe the place where you have lived the longest to date

1. Village/town
2. City center/District
3. Metropolitan

9. Do you need help with your daytime needs? (Such as feeding, toileting, dressing, bathing)

1. No
2. Rarely needs help
3. Often needs help
4. Fully dependent

10. Type of cancer

1. Bladder
2. Breast
3. Cervix
4. Colorectal
5. Esophagus
6. Head and neck
7. Kidney
8. Lung
9. Ovarian
10. Pancreas
11. Sarcoma
12. Melanoma-skin
13. Stomach
14. Testicular
15. Uterus

**SECTION 2: ICT USAGE AND HEALTH INFORMATION SEEKING BEHAVIORS (Items 11-23)**

11. Would you like to be informed about health-related issues?

1. Yes
2. No

12. Do you try to find out information about the prescribed medications, including their side effects?

1. All the time
2. Often
3. Sometimes

4. Rarely

5. Never

13. Where do you look for health-related information?

(Please indicate frequency for EACH source)

a) Healthcare workers

☐ All the time ☐ Often ☐ Sometimes ☐ Rarely ☐ Never

b) Internet

☐ All the time ☐ Often ☐ Sometimes ☐ Rarely ☐ Never

c) Television programs

☐ All the time ☐ Often ☐ Sometimes ☐ Rarely ☐ Never

d) People near me (friends, relatives, neighbors)

☐ All the time ☐ Often ☐ Sometimes ☐ Rarely ☐ Never

e) Newspapers, magazines and brochures

☐ All the time ☐ Often ☐ Sometimes ☐ Rarely ☐ Never

f) Mobile apps

☐ All the time ☐ Often ☐ Sometimes ☐ Rarely ☐ Never

14. When did you start researching information about your health?

1. When healthy

2. When your complaints start (before consulting a doctor)

3. After diagnosis

4. During treatment

15. Is it easy to understand the health information you find on the internet?

1. Usually

2. Sometimes

3. Always

4. Never

16. Do you trust the health information you find online?

1. Yes

2. No

3. Depends on the website

17. Do you search the internet for information about your disease and/or treatment BEFORE you go to your doctor's appointment?

1. Yes

2. No

18. Do you search the internet for information about your disease and/or treatment AFTER you go to your doctor's appointment?

1. Yes

2. Only if I still have doubts about something

3. No

19. Has there been a change in your search for information on social media platforms after you started following up with your doctor?

1. Increased

2. Decreased

3. Unchanged

20. Is your mobile phone a smartphone?

1. No

2. Yes

21. Do you have health-related applications installed?

1. No

2. Yes

22. Would you use a health app if your healthcare provider recommended it?

1. No

2. Yes

23. If this application was paid, would you still afford it?

1. No

2. Possibly

3. Yes

## **PART B: TURKISH HEALTH LITERACY SCALE-32 (TSOY-32)**

**Reference: Okayay P, Abacigil F, et al. Turkish Health Literacy Scale-32 (TSOY-32).**

**Developed by Department of Public Health, Hacettepe University in collaboration with**

**the General Directorate of Health Promotion, Turkish Ministry of Health.**

Instructions: If you rate it from very easy to very difficult, how easy/difficult is it for you to do the following?

(Please mark X in the relevant space.)

Rating Scale: 1 = Very easy 2 = Easy 3 = Difficult 4 = Very difficult 5 = I have no idea

| If you rate it from very easy to very difficult, how easy/difficult is it for you to do the following? (Please put an X in the relevant space.) | 1<br>very<br>easy | 2<br>easy | 3<br>difficult | 4 Very<br>difficult | 5 I<br>have<br>no<br>idea |
|-------------------------------------------------------------------------------------------------------------------------------------------------|-------------------|-----------|----------------|---------------------|---------------------------|
| 1 When you have a complaint about your health, investigate whether it is a sign of illness                                                      |                   |           |                |                     |                           |
| 2 When you have a complaint about your health, read and understand any article (such as brochures, booklets, posters) on this subject           |                   |           |                |                     |                           |
| 3 If you have a complaint about your health, consider whether the advice of your family or friends is reliable                                  |                   |           |                |                     |                           |
| 4 When you want to go to a health institution, research and find out which doctor you should consult                                            |                   |           |                |                     |                           |
| 5 When you want to go to a health institution, research and find out how to make your application (such as making an appointment)               |                   |           |                |                     |                           |
| 6 When you want to go to a health institution, make an appointment by phone or internet                                                         |                   |           |                |                     |                           |
| 7 To search and find information about the treatments of diseases that concern you                                                              |                   |           |                |                     |                           |
| 8 Understanding your doctor's explanations about your disease                                                                                   |                   |           |                |                     |                           |
| 9 Evaluating the advantages and disadvantages of different treatment options recommended by your doctor                                         |                   |           |                |                     |                           |
| 10 Using your medications as recommended by healthcare professionals (such as doctors, pharmacists)                                             |                   |           |                |                     |                           |
| 11 Understanding the instructions on the medicine box for using the medicine                                                                    |                   |           |                |                     |                           |
| 12 Deciding if you need a second opinion from a different doctor                                                                                |                   |           |                |                     |                           |
| 13 To understand information about preparations before the analysis/examination (such as following a diet)                                      |                   |           |                |                     |                           |
| 14 Searching and finding the location of the unit (such as laboratory, polyclinic) you want to reach in the hospital                            |                   |           |                |                     |                           |
| 15 Deciding what to do in an emergency (such as an accident, sudden health problem)                                                             |                   |           |                |                     |                           |
| 16 Calling an ambulance when necessary                                                                                                          |                   |           |                |                     |                           |
| 17 To have your health follow-ups and controls at regular intervals as recommended by your doctor.                                              |                   |           |                |                     |                           |
| 18 Researching and finding information about conditions that may be harmful to your health, such as being overweight and high blood pressure    |                   |           |                |                     |                           |
| 19 Understanding health warnings about conditions that can be harmful to your health, such as being overweight, high blood pressure             |                   |           |                |                     |                           |
| 20 Searching for information on how to deal with unhealthy behaviors such as smoking and insufficient physical activity                         |                   |           |                |                     |                           |
| 21 Understanding health warnings about how to deal with unhealthy behaviors such as smoking, insufficient physical activity                     |                   |           |                |                     |                           |

|                                                                                                                                                                                                             |  |  |  |  |  |
|-------------------------------------------------------------------------------------------------------------------------------------------------------------------------------------------------------------|--|--|--|--|--|
| <b>22</b> To search and find information about the health screenings you need to have in relation to your age, gender and health status (such as breast screenings for women and prostate diseases for men) |  |  |  |  |  |
| <b>23</b> To understand the information recommended to be healthier in sources such as the internet, newspapers, television, radio                                                                          |  |  |  |  |  |
| <b>24</b> To decide whether the information recommended to be done in order to be healthier in sources such as the internet, newspapers, television, radio is reliable or not                               |  |  |  |  |  |
| <b>25</b> Understanding the information on food packaging that you think may affect your health                                                                                                             |  |  |  |  |  |
| <b>26</b> To evaluate the positive and negative characteristics of the environment you live in (such as home, street, neighborhood) that affect health.                                                     |  |  |  |  |  |
| <b>27</b> To find information about what can be done to make the environment you live in (such as home, street, neighborhood) healthier                                                                     |  |  |  |  |  |
| <b>28</b> Evaluating which of your daily behaviors (such as doing sports, eating healthy, not smoking) affect your health                                                                                   |  |  |  |  |  |
| <b>29</b> Changing your lifestyle (such as doing sports, eating healthy, not smoking) for your health                                                                                                       |  |  |  |  |  |
| <b>30</b> To be able to apply the diet list given in writing by the dietitian                                                                                                                               |  |  |  |  |  |
| <b>31</b> Giving suggestions to your family or friends about being healthier                                                                                                                                |  |  |  |  |  |
| <b>32</b> Interpreting health-related policy changes                                                                                                                                                        |  |  |  |  |  |
